# Supplementary material for: Cytogenomic Abnormalities in 19 Cases of Salivary Gland Tumors of Parotid Gland Origin
Source: Hindawi journal article supplement (doi:10.1155/2020/8897541), 2020-12-02
Supplement: f1 [file 8897541.f1.zip]

**Supplemental Table 1. Genomic CNAs detected in 19 cases of SGTs of parotid origin\***

| Case No. | Regions         | Genomic coordinates (hg18) | Size (Mb) | CNAs | Whole-arm/chr abns |
|----------|-----------------|----------------------------|-----------|------|--------------------|
| 4        | 1q41            | chr1:213927297-216681725   | 2.754     | dup  |                    |
|          | 3q11.2-q12.1    | chr3:95329130-99993678     | 4.665     | dup  |                    |
|          | 6q23.1-q25.3    | chr6:130409579-159591681   | 29.182    | del  |                    |
|          | 11p14.2-p14.1   | chr11:26677338-28306429    | 1.629     | dup  |                    |
|          | 21q21.1-q21.2   | chr21:16373344-24560645    | 8.187     | dup  |                    |
|          | 21q22.11        | chr21:33246146-34157533    | 0.911     | del  |                    |
|          | Xp21.1          | chrX:31996653-36210788     | 4.214     | dup  |                    |
| 5        | 10q21.1         | chr10:55040378-56196587    | 1.156     | dup  |                    |
|          | 10q23.1-q23.33  | chr10:86199272-95156126    | 8.957     | dup  |                    |
|          | 17p13.2-p13.1   | chr17:4462922-8216238      | 3.753     | del  |                    |
|          | 17q21.2         | chr17:36740644-36963832    | 0.223     | del  |                    |
|          | 21q22.11-q22.12 | chr21:34632707-34997218    | 0.365     | dup  |                    |
| 6        | 2q33.2-q33.3    | chr2:205367575-207460978   | 2.093     | dup  |                    |
|          | 3p14.1          | chr3:64185680-66953491     | 2.768     | dup  |                    |
|          | 3q11.2          | chr3:96210835-99173162     | 2.962     | dup  |                    |
|          | 16q21           | chr16:58897364-63579800    | 4.682     | dup  |                    |
|          | 21q22.11        | chr21:33246146-33982696    | 0.737     | del  |                    |
| 7        | 1p31.1          | chr1:72058394-76393250     | 4.335     | del  |                    |
|          | 1q22-q23.1      | chr1:154140183-156831970   | 2.692     | dup  |                    |
|          | 2p25.3-p25.1    | chr2:3055334-9137503       | 6.082     | del  |                    |
|          | 4q28.3-q31.1    | chr4:138727543-141177344   | 2.45      | dup  |                    |
|          | 5q32            | chr5:143289410-146866603   | 3.577     | del  |                    |
|          | 6p22.3          | chr6:20434423-22592845     | 2.158     | del  |                    |
|          | 6q11.1-q14.1    | chr6:62854106-76024836     | 13.171    | del  |                    |
|          | 7p21.3-p15.3    | chr7:8489818-20689832      | 12.2      | del  |                    |
|          | 7q22.1          | chr7:98708511-100967327    | 2.259     | dup  |                    |
|          | 8p12-p11.21     | chr8:30336607-40456730     | 10.12     | del  |                    |
|          | 8p22.3          | chr8:101947780-104198166   | 2.25      | dup  |                    |
|          | 9p13.3-p13.2    | chr9:33900270-36589798     | 2.69      | dup  |                    |
|          | 9q21.11-q21.33  | chr9:71840721-89218488     | 17.378    | del  |                    |
|          | 11q12.1-q12.2   | chr11:57984015-60454740    | 2.471     | del  |                    |
|          | 11q12.2-q13.2   | chr11:60478523-68454641    | 7.976     | dup  |                    |
|          | 12q12-q13.11    | chr12:38765904-45595565    | 6.83      | del  |                    |
|          | 12q13.2-q13.3   | chr12:54901971-56004927    | 1.103     | del  |                    |
|          | 12q14.1-q23.3   | chr12:58369317-102792445   | 44.423    | del  |                    |
|          | 12q24.32-q24.33 | chr12:125717085-131801952  | 6.085     | del  |                    |
|          | 14q11.2-q12     | chr14:23237389-25075872    | 1.838     | dup  |                    |
|          | 14q24.2-q24.3   | chr14:71443780-73860367    | 2.417     | del  |                    |
|          | 15q11.2-q26.3   | chr15:23027575-102241547   | 77.311    | gain | 15q+               |
|          | 16p11.2         | chr16:29976404-30954138    | 0.978     | dup  |                    |
|          | 16q12.2         | chr16:51371871-53914036    | 2.542     | del  |                    |
|          | 17p13.1         | chr17:7081635-8151448      | 1.07      | dup  |                    |
|          | 17q21.2-q21.32  | chr17:36472975-42191036    | 5.718     | dup  |                    |
|          | 17q22-q23.1     | chr17:49284019-55252314    | 5.968     | del  |                    |
|          | 20q13.33        | chr20:60881976-62634966    | 1.554     | dup  |                    |
|          | 21q11.2-q22.11  | chr21:14640192-32123332    | 17.483    | del  |                    |
|          | Xp22.33-q11.1   | chrX:3059247-62858884      | 59.8      | loss | Xp-                |

|    |                 |                           |         |      |     |
|----|-----------------|---------------------------|---------|------|-----|
| 8  | 6p21.1          | chr6:42141477-43419698    | 1.278   | dup  |     |
|    | 7p21.3          | chr7:8217664-12448273     | 4.23    | del  |     |
|    | 7q22.1          | chr7:99222667-102448818   | 3.226   | dup  |     |
|    | 16p11.2         | chr16:30002992-31504773   | 1.502   | dup  |     |
|    | 18q21.2-q21.31  | chr18:50001399-54362080   | 4.361   | del  |     |
| 9  | 7q22.1          | chr7:99222667-102448818   | 3.226   | dup  |     |
|    | 10q11.23-q21.1  | chr10:52734291-56196587   | 3.462   | del  |     |
|    | 16p13.3         | chr16:1940255-3141763     | 1.202   | dup  |     |
|    | 16p11.2         | chr16:29983228-31504773   | 1.521   | dup  |     |
| 10 | 4p15.1-p14      | chr4:33783065-37078326    | 3.295   | del  |     |
|    | 8q23.3          | chr8:114075883-115500013  | 1.424   | del  |     |
|    | 8q24.22         | chr8:133906398-134354287  | 0.448   | dup  |     |
|    | 11q24.3         | chr11:129287143-130089614 | 0.802   | dup  |     |
|    | 15q15.1         | chr15:38117022-39129686   | 1.013   | dup  |     |
|    | 15q25.1         | chr15:76621644-77108705   | 0.487   | del  |     |
|    | 21q21.2-q21.3   | chr21:23733501-26368243   | 2.635   | del  |     |
|    | Yp11.31-q12     | chrY:2716261-57441009     | 54.725  | loss | Y-  |
| 12 | 1p36.33-p35.1   | chr1:749425-32472119      | 31.723  | dup  |     |
|    | 1p34.3-p34.2    | chr1:37039102-40651468    | 3.612   | amp  |     |
|    | 1p34.1-p31.1    | chr1:45468271-77578959    | 32.111  | dup  |     |
|    | 1q41            | chr1:214532032-216654201  | 2.122   | dup  |     |
|    | 3p26.3-p11.1    | chr3:134511-90336893      | 90.202  | loss | 3p- |
|    | 3q11.2-q29      | chr3:95136354-199324877   | 104.189 | gain | 3q+ |
|    | 4q28.2-q28.3    | chr4:131095257-136998946  | 5.904   | del  |     |
|    | 5p15.33-p11     | chr5:204537-46136265      | 45.932  | gain | 5p+ |
|    | 6p25.3-p21.31   | chr6:1786486-36035503     | 34.249  | dup  |     |
|    | 7p21.2-p21.1    | chr7:14768534-16127866    | 1.359   | del  |     |
|    | 7q11.23         | chr7:72529024-75977418    | 3.448   | dup  |     |
|    | 9p24.2-p23      | chr9:2941153-9748013      | 6.807   | del  |     |
|    | 10p15.3-q26.3   | chr10:238264-135254661    | 135.016 | loss | 10- |
|    | 11p15.4         | chr11:6211203-6596014     | 0.385   | dup  |     |
|    | 14q11.2-q12     | chr14:22307229-24112769   | 1.806   | dup  |     |
| 14 | 5q21.1-q31.1    | chr5:101301623-134780095  | 33.478  | del  |     |
|    | 6q11.1-q27      | chr6:62796573-166449705   | 103.653 | del  | 6q- |
|    | 9p22.1-p21.2    | chr9:19597033-26999800    | 7.403   | del  |     |
|    | 9q31.1          | chr9:102946923-104087391  | 1.14    | del  |     |
|    | 10q26.13-q26.3  | chr10:123208606-133915151 | 10.707  | del  |     |
|    | 17p13.1-p12     | chr17:9173836-15133286    | 5.959   | del  |     |
|    | 18p11.32-p11.21 | chr18:14116-13762450      | 13.748  | del  |     |
| 15 | 7p21.3          | chr7:8217664-12534438     | 4.317   | del  |     |
|    | 7q22.1          | chr7:99809498-101343821   | 1.534   | dup  |     |
|    | 9p24.1-p23      | chr9:8467034-12196342     | 3.729   | del  |     |
|    | 10q11.23-q21.1  | chr10:52888130-56196587   | 3.308   | del  |     |
| 16 | Yp11.31-q12     | chrY:2656261-28767745     | 26.111  | loss | Y-  |
| 17 | 3p14.1          | chr3:63858941-66953491    | 3.095   | dup  |     |
| 18 | 8q21.11-q21.12  | chr8:75177077-78534818    | 3.358   | dup  |     |
|    | 8q22.3-q23.1    | chr8:105229117-107465156  | 2.236   | dup  |     |
| 19 | 3p24.3          | chr3:15780938-16483557    | 0.703   | del  |     |
|    | 6q13            | chr6:74206488-75616871    | 1.41    | del  |     |
|    | 7q32.2-q32.3    | chr7:130068191-130771678  | 0.704   | del  |     |

|          |                         |       |     |
|----------|-------------------------|-------|-----|
| 16q21    | chr16:58805277-63136942 | 4.332 | dup |
| 21q22.11 | chr21:33411320-33982696 | 0.571 | del |

---

\* A total of 90 CNAs and 9 whole-arm or whole chromosome abnormalities (highlighted).
