# Supplementary material for: Cytogenomic Abnormalities in 19 Cases of Salivary Gland Tumors of Parotid Gland Origin
Source: Hindawi journal article supplement (doi:10.1155/2020/8897541), 2020-12-02
Supplement: f1 [file 8897541.f1.zip]

**Supplemental Table 2. Sorted overlapped regions for recurrent CNAs and possible candidate genes\***

| Case No. | Region         | hg18                     | Size (Mb) | CNAs | Tumor Genes                                        |
|----------|----------------|--------------------------|-----------|------|----------------------------------------------------|
| 9        | 10q11.23-q21.1 | chr10:52734291-56196587  | 3.462     | del  | /PRKG1-MBL2-PCDH15/                                |
| 15       | 10q11.23-q21.1 | chr10:52888130-56196587  | 3.308     | del  | /PRKG1-MBL2-PCDH15/                                |
| 7        | 14q11.2-q12    | chr14:23237389-25075872  | 1.838     | dup  |                                                    |
| 12       | 14q11.2-q12    | chr14:22307229-24112769  | 1.806     | dup  |                                                    |
| 7        | 16p11.2        | chr16:29976404-30954138  | 0.978     | dup  |                                                    |
| 8        | 16p11.2        | chr16:30002992-31504773  | 1.502     | dup  |                                                    |
| 9        | 16p11.2        | chr16:29983228-31504773  | 1.521     | dup  |                                                    |
| 6        | 16q21          | chr16:58897364-63579800  | 4.682     | dup  | CDH8, CDH11/                                       |
| 19       | 16q21          | chr16:58805277-63136942  | 4.332     | dup  | CDH8                                               |
| 7        | 17p13.1        | chr17:7081635-8151448    | 1.07      | dup  | TP53                                               |
| 5        | 17p13.2-p13.1  | chr17:4462922-8216238    | 3.753     | del  | TP53                                               |
| 7        | 1p31.1         | chr1:72058394-76393250   | 4.335     | del  |                                                    |
| 12       | 1p34.1-p31.1   | chr1:45468271-77578959   | 32.111    | dup  |                                                    |
| 4        | 1q41           | chr1:213927297-216681725 | 2.754     | dup  | /USH2A-ESRRG-GPATCH2-SPATA17-RRP15-TGFB2/          |
| 12       | 1q41           | chr1:214532032-216654201 | 2.122     | dup  | /USH2A-ESRRG-GPATCH2-SPATA17-RRP15-TGFB2/          |
| 7        | 21q11.2-q22.11 | chr21:14640192-32123332  | 17.483    | del  |                                                    |
| 10       | 21q21.2-q21.3  | chr21:23733501-26368243  | 2.635     | del  | MRPL39, JAM2, ATP5J, APP                           |
| 4        | 21q22.11       | chr21:33246146-34157533  | 0.911     | del  |                                                    |
| 6        | 21q22.11       | chr21:33246146-33982696  | 0.737     | del  |                                                    |
| 19       | 21q22.11       | chr21:33411320-33982696  | 0.571     | del  |                                                    |
| 6        | 3p14.1         | chr3:64185680-66953491   | 2.768     | dup  | FRICKLE2, ADAMTS9, MAGI1, ALC25A26, LIRG1          |
| 17       | 3p14.1         | chr3:63858941-66953491   | 3.095     | dup  |                                                    |
| 6        | 3q11.2         | chr3:96210835-99173162   | 2.962     | dup  | MTHFD2P, EPHA6, ARL6                               |
| 4        | 3q11.2-q12.1   | chr3:95329130-99993678   | 4.665     | dup  |                                                    |
| 7        | 6q11.1-q14.1   | chr6:62854106-76024836   | 13.171    | del  |                                                    |
| 14       | 6q11.1-q27     | chr6:62796573-166449705  | 103.653   | del  |                                                    |
| 19       | 6q13           | chr6:74206488-75616871   | 1.41      | del  | MTO1, EEF1A1, CD109,                               |
| 4        | 6q23.1-q25.3   | chr6:130409579-159591681 | 29.182    | del  | MYB 6q23.3-135.5 Mb                                |
| 12       | 7p21.2-p21.1   | chr7:14768534-16127866   | 1.359     | del  |                                                    |
| 8        | 7p21.3         | chr7:8217664-12448273    | 4.23      | del  | ICA1, NXPH1, FER4, NDUFA4, PHF14, THSD7A, TMEM106B |
| 15       | 7p21.3         | chr7:8217664-12534438    | 4.317     | del  |                                                    |
| 7        | 7p21.3-p15.3   | chr7:8489818-20689832    | 12.2      | del  |                                                    |
| 7        | 7q22.1         | chr7:98708511-100967327  | 2.259     | dup  |                                                    |
| 8        | 7q22.1         | chr7:99222667-102448818  | 3.226     | dup  |                                                    |
| 9        | 7q22.1         | chr7:99222667-102448818  | 3.226     | dup  |                                                    |
| 15       | 7q22.1         | chr7:99809498-101343821  | 1.534     | dup  | PILRA,..., CUX1                                    |
| 15       | 9p24.1-p23     | chr9:8467034-12196342    | 3.729     | del  | PTPRD                                              |
| 12       | 9p24.2-p23     | chr9:2941153-9748013     | 6.807     | del  |                                                    |

\*A total of 38 CNAs at 15 chromosome loci.
