# Supplementary material for: Cytogenomic Abnormalities in 19 Cases of Salivary Gland Tumors of Parotid Gland Origin
Source: Case Rep Genet. 2020 Dec 2;2020:8897541. doi: 10.1155/2020/8897541 (PMC7725583; doi:10.1155/2020/8897541)
Supplement: Supplementary Materials — Supplemental Table 1: genomic CNAs detected in 19 cases of SGTs of parotid origin. Supplemental Table 2: sorted overlapped regions for recurrent CNAs and possible candidate genes. [file 8897541.f1.zip]

Archive with 2 entries (2 files):
- 8897541.f1/Suppl Tables 1_SGT_v5.pdf
- 8897541.f1/Suppl Tables 2_SGT_v5.pdf
